# Supplementary material for: Predicted effects of landscape change, sea level rise, and habitat management on the extirpation risk of the Hawaiian common gallinule (Gallinula galeata sandvicensis) on the island of O‘ahu
Source: PeerJ. 2018 Jun 22;6:e4990. doi: 10.7717/peerj.4990 (PMC6016525; doi:10.7717/peerj.4990)
Supplement: Supplemental Information 1 — Each line represents the results of counts taken using the playback method of DesRochers, Gee & Reed (2008) at a particular pond in each wetland complex. Totals for individual wetlands and individual wetland complexes are presented. Each count was carried out using 1 minute of playback followed by 1 minute of silence, recording all adult birds seen during that period; these were repeated at 20 m intervals around the entire perimeter of each pond. [file peerj-06-4990-s001.xlsx]

## Sheet: Sheet1
PlaybackSurvey_Count	Wetland	PondName	Year	Total
3	Bellows	Mauka_Canal	2017
6	Bellows	Makai_Canal	2017
6	Bellows	Marsh	2017	15
25	Hamakua	1	2017
32	Hamakua	2	2017			Complex totals
11	Hamakua	3	2017			76		Kahuku complex
27	Hamakua	4	2017	95		138		Windward complex
9	Honouliuli	1	2017			28		Pearl Harbor complex
4	Honouliuli	2	2017	3
10	Hugo	Kaelepulu	2017	10
4	JCNWR	Fmauka	2017
9	JCNWR	Fmakai	2017
12	JCNWR	Cmakai	2017
8	JCNWR	cmauka	2017
5	JCNWR	G	2017
8	JCNWR	D	2017
0	JCNWR	E	2017
7	JCNWR	B	2017
3	JCNWR	A	2017
4	JCNWR	EP	2017	60
0	Kawainui	7	2017
1	Kawainui	8	2017
0	Kawainui	9	2017
3	Kawainui	10	2017
0	Kawainui	11	2017
1	Kawainui	Forest	2017
1	Kawainui	3	2017
0	Kawainui	4	2017
0	Kawainui	5	2017
0	Kawainui	Mauka_Canal	2017	6
0	Olomana	13_15	2017
0	Olomana	5_6	2017
0	Olomana	1_2017	2017
1	Olomana	1_2015	2017
2	Olomana	8_9	2017
2	Olomana	14	2017
3	Olomana	15_3	2017
0	Olomana	4_7	2017
4	Olomana	2	2017	12
6	Pouhala	A	2017
0	Pouhala	B	2017
2	Pouhala	Marsh	2017	8
2	Shrimp Ponds	A	2017
0	Shrimp Ponds	B	2017
0	Shrimp Ponds	C	2017
0	Shrimp Ponds	E	2017
12	Shrimp Ponds	F	2017
2	Shrimp Ponds	D	2017	16
0	Waiawa	1	2017
0	Waiawa	2	2017
	Waiawa Kai	2	2017
4	Waiawa Kai	3	2017
3	Waiawa Kai	1	2017
